# Supplementary material for: Mediterranean Diet and Ultra-Processed Food Intake in Older Australian Adults—Associations with Frailty and Cardiometabolic Conditions
Source: MDPI journal article supplement (doi:10.3390/nu16172978), 2024-09-03
Supplement: s1 [file s1]

**Supplementary Table S1.** Food frequency questionnaire used in ASPREE longitudinal study of older persons (ALSOP)

| <b>Food Item</b>                                            | <b>Never/ rarely</b> | <b>Once or twice a month</b> | <b>Once or twice a week</b> | <b>Often or 3-6 times per week</b> | <b>Every day or several times a day</b> |
|-------------------------------------------------------------|----------------------|------------------------------|-----------------------------|------------------------------------|-----------------------------------------|
| Cheese                                                      |                      |                              |                             |                                    |                                         |
| Yoghurt                                                     |                      |                              |                             |                                    |                                         |
| Cream, cream cheese or similar                              |                      |                              |                             |                                    |                                         |
| Ice cream, frozen yoghurt or other dairy desserts           |                      |                              |                             |                                    |                                         |
| White bread                                                 |                      |                              |                             |                                    |                                         |
| Brown/multigrain bread                                      |                      |                              |                             |                                    |                                         |
| Breakfast cereal/ oats                                      |                      |                              |                             |                                    |                                         |
| Rice                                                        |                      |                              |                             |                                    |                                         |
| Pasta / noodles                                             |                      |                              |                             |                                    |                                         |
| Crackers / savoury biscuits                                 |                      |                              |                             |                                    |                                         |
| Fresh fruit                                                 |                      |                              |                             |                                    |                                         |
| Cooked, tinned or dried fruit                               |                      |                              |                             |                                    |                                         |
| Raw/salad vegetables                                        |                      |                              |                             |                                    |                                         |
| Cooked green vegetables                                     |                      |                              |                             |                                    |                                         |
| Cooked orange / yellow / red vegetables e.g. carrots, beets |                      |                              |                             |                                    |                                         |
| Potatoes                                                    |                      |                              |                             |                                    |                                         |

|                                                                      |  |  |  |  |  |
|----------------------------------------------------------------------|--|--|--|--|--|
| Beans and Legumes<br>e.g. peas, lentils                              |  |  |  |  |  |
| Red meat (not corned, pickled<br>or processed)                       |  |  |  |  |  |
| Chicken, turkey, other poultry                                       |  |  |  |  |  |
| Sausages                                                             |  |  |  |  |  |
| Processed meats e.g. bacon,<br>ham, corned beef or salami            |  |  |  |  |  |
| Eggs                                                                 |  |  |  |  |  |
| Deep fried/battered fish                                             |  |  |  |  |  |
| Salmon, mackerel or other oily fish<br>not including deep fried fish |  |  |  |  |  |
| White fish,<br>not including deep fried fish                         |  |  |  |  |  |
| Tinned fish e.g. canned salmon,<br>tuna, sardines                    |  |  |  |  |  |
| Other seafood e.g. prawns or<br>shellfish                            |  |  |  |  |  |
| Nuts                                                                 |  |  |  |  |  |
| Potato chips or similar                                              |  |  |  |  |  |
| Sweet biscuits/ cakes                                                |  |  |  |  |  |
| Dark Chocolate                                                       |  |  |  |  |  |
| Milk Chocolate                                                       |  |  |  |  |  |
| Lollies or other sweets                                              |  |  |  |  |  |

|                                             |                      |                                  |                             |                        |                              |
|---------------------------------------------|----------------------|----------------------------------|-----------------------------|------------------------|------------------------------|
| Hamburgers, pizza<br>or 'fast' food         |                      |                                  |                             |                        |                              |
| Meat pies, sausage rolls etc                |                      |                                  |                             |                        |                              |
|                                             |                      |                                  |                             |                        |                              |
| Drinks                                      | <b>Never/ rarely</b> | <b>Once per week or<br/>less</b> | <b>Several times a week</b> | <b>1-2 times a day</b> | <b>3 or more times / day</b> |
| Full-cream milk                             |                      |                                  |                             |                        |                              |
| Low-fat or skim milk                        |                      |                                  |                             |                        |                              |
| Soy or other non-dairy milk                 |                      |                                  |                             |                        |                              |
| Water                                       |                      |                                  |                             |                        |                              |
| Coffee                                      |                      |                                  |                             |                        |                              |
| Tea                                         |                      |                                  |                             |                        |                              |
| Malt drinks e.g. Milo or Horlicks           |                      |                                  |                             |                        |                              |
| Hot chocolate                               |                      |                                  |                             |                        |                              |
| Fruit juice                                 |                      |                                  |                             |                        |                              |
| Cordial                                     |                      |                                  |                             |                        |                              |
| Soft Drink e.g. regular Coke                |                      |                                  |                             |                        |                              |
| Diet Soft drink e.g. diet Coke              |                      |                                  |                             |                        |                              |
| Supplement drink<br>e.g. Ensure or Sustagen |                      |                                  |                             |                        |                              |
| Herbal tea                                  |                      |                                  |                             |                        |                              |
|                                             |                      |                                  |                             |                        |                              |

| Which was the most common cooking oil used in your household? (Select one only) | Yes | No |
|---------------------------------------------------------------------------------|-----|----|
| Olive oil                                                                       |     |    |
| Butter                                                                          |     |    |
| Other vegetable oil                                                             |     |    |
| Don't know                                                                      |     |    |
|                                                                                 |     |    |
| Did you regularly add salt to your cooking?                                     |     |    |
| Did you regularly add salt to your food at the table?                           |     |    |

\* Response recorded for question: Please think about your diet over the last 12 months. How often did you eat the following foods?

**Supplementary Table S2.** ASPREE-UPF components and scoring.

| Over the past year, how often did you have a <i>cup</i> of the following drinks? | Never/Rarely | Once per week or less | Several times a week | 1-2 times per day | 3 or more times per day |
|----------------------------------------------------------------------------------|--------------|-----------------------|----------------------|-------------------|-------------------------|
| Malt drinks (e.g., Milo or Horlicks)                                             | 0            | 0.25                  | 0.5                  | 0.75              | 1                       |
| Alternative Milks                                                                | 0            | 0.25                  | 0.5                  | 0.75              | 1                       |
| Hot Chocolate                                                                    | 0            | 0.25                  | 0.5                  | 0.75              | 1                       |
| Cordial                                                                          | 0            | 0.25                  | 0.5                  | 0.75              | 1                       |
| Juice                                                                            | 0            | 0.25                  | 0.5                  | 0.75              | 1                       |
| Soft Drink                                                                       | 0            | 0.25                  | 0.5                  | 0.75              | 1                       |
| Diet Soft Drink                                                                  | 0            | 0.25                  | 0.5                  | 0.75              | 1                       |
| Supplemental Drinks (e.g., Sustagen)                                             | 0            | 0.25                  | 0.5                  | 0.75              | 1                       |

|                                                       | Never/Rarely | 1-3 times per month | 1 day per week | 2-3 days per week | 4-6 days per week | Every day |
|-------------------------------------------------------|--------------|---------------------|----------------|-------------------|-------------------|-----------|
| Over the past year, how often do you eat pre-prepared | 0            | 0.2                 | 0.4            | 0.6               | 0.8               | 1         |

|                                                                                  |  |  |  |  |  |  |
|----------------------------------------------------------------------------------|--|--|--|--|--|--|
| meals? E.g., those bought frozen or home-delivered that you might reheat at home |  |  |  |  |  |  |
|----------------------------------------------------------------------------------|--|--|--|--|--|--|

| Please think about your diet over the last <b>12 months</b> . How often did you eat the following foods? | Never/Rarely | Once or twice a month | Once or twice a week | Often 3-6 times per week | Every day or several times per day |
|----------------------------------------------------------------------------------------------------------|--------------|-----------------------|----------------------|--------------------------|------------------------------------|
| Sausages                                                                                                 | 0            | 0.25                  | 0.5                  | 0.75                     | 1                                  |
| Processed Meats (e.g., bacon, ham, corned beef or salami)                                                | 0            | 0.25                  | 0.5                  | 0.75                     | 1                                  |
| Potato chips (or similar)                                                                                | 0            | 0.25                  | 0.5                  | 0.75                     | 1                                  |
| Sweet biscuits / cake                                                                                    | 0            | 0.25                  | 0.5                  | 0.75                     | 1                                  |
| Dark Chocolate                                                                                           | 0            | 0.25                  | 0.5                  | 0.75                     | 1                                  |
| Milk Chocolate                                                                                           | 0            | 0.25                  | 0.5                  | 0.75                     | 1                                  |
| Lollies or other sweets                                                                                  | 0            | 0.25                  | 0.5                  | 0.75                     | 1                                  |
| Burgers, Pizza, or 'fast food'                                                                           | 0            | 0.25                  | 0.5                  | 0.75                     | 1                                  |

|                                                    |   |      |     |      |   |
|----------------------------------------------------|---|------|-----|------|---|
| Meat Pies, Sausage Rolls, etc.                     | 0 | 0.25 | 0.5 | 0.75 | 1 |
| Ice-cream, frozen yoghurt, or other dairy desserts | 0 | 0.25 | 0.5 | 0.75 | 1 |
| White bread                                        | 0 | 0.25 | 0.5 | 0.75 | 1 |
| Brown/multigrain bread                             | 0 | 0.25 | 0.5 | 0.75 | 1 |
| Cereal / Oats                                      | 0 | 0.25 | 0.5 | 0.75 | 1 |
| Crackers / savoury biscuits                        | 0 | 0.25 | 0.5 | 0.75 | 1 |
| Yoghurt                                            | 0 | 0.25 | 0.5 | 0.75 | 1 |
| Cream, Cream Cheese, or similar                    | 0 | 0.25 | 0.5 | 0.75 | 1 |

**Items Not Included:** Whole milk, skim/light milk, water, coffee, tea, fruit juice, herbal tea, cooking oil (olive oil vs butter vs other vegetable oil vs do not know), addition of salt to cooking, addition of salt to table, missed meal frequency, unprocessed red meat, chicken/poultry, eggs, fried/battered fish, oily fish, tinned fish, white fish, prawns/shellfish, nuts, cheese, rice, pasta/noodles, fresh fruit, tinned/dried/cooked fruit, raw/salad vegetables, cooked green vegetables, cooked orange/yellow/red vegetables, potatoes, legumes/beans.

The total **ASPREE-UPF** score is the sum of each of the scores attributable to each of these UPFs.

**Supplementary Table S3.** ASPREE-MDS components and scoring.

| Food Category                | Never | 1-2/Month | 1-2/Week | 3-6/Week | Daily or more | Scoring System                                                                          |
|------------------------------|-------|-----------|----------|----------|---------------|-----------------------------------------------------------------------------------------|
| Green Vegetables             |       |           |          |          |               | Sum all to a maximum of 1.5 points, then divide by 1.5<br><br><b>Maximum of 1 point</b> |
| Raw / Salad Vegetables       | 0     | 0         | 0.33     | 0.67     | 1             |                                                                                         |
| Cooked Green Vegetables      | 0     | 0         | 0.33     | 0.67     | 1             |                                                                                         |
| Other Vegetables             |       |           |          |          |               | Sum all to a maximum of 1.5 points, then divide by 1.5<br><br><b>Maximum of 1 point</b> |
| Cooked Red/Orange/Yellow Veg | 0     | 0         | 0.33     | 0.67     | 1             |                                                                                         |
| Potatoes                     | 0     | 0         | 0.33     | 0.67     | 1             |                                                                                         |
| Grains                       |       |           |          |          |               | Sum all to a maximum of 3 points, then divide by 3<br><br><b>Maximum of 1 point</b>     |
| Brown Bread*                 | 0     | 0         | 0.33     | 0.67     | 1             |                                                                                         |
| Cereal and Oats              | 0     | 0         | 0.33     | 0.67     | 1             |                                                                                         |
| Rice                         | 0     | 0         | 0.33     | 0.67     | 1             |                                                                                         |
| Pasta / Noodles              | 0     | 0         | 0.33     | 0.67     | 1             |                                                                                         |
| Fruit                        |       |           |          |          |               | Sum All<br><br><b>Maximum of 1</b>                                                      |
| Fresh Fruit                  | 0     | 0         | 0.33     | 0.67     | 1             |                                                                                         |
| Tinned/Dried Fruit           | 0     | 0         | 0.33     | 0.5      | 0.5           |                                                                                         |
| Chicken/Poultry              | 0     | 0.33      | 1        | 0.67     | 0.33          | <b>Maximum of 1</b>                                                                     |
| Red Meat (unprocessed)       | 1     | 1         | 0.67     | 0.33     | 0             | <b>Maximum of 1</b>                                                                     |



|                         |                     |                              |                               |                          |                                |                                                 |
|-------------------------|---------------------|------------------------------|-------------------------------|--------------------------|--------------------------------|-------------------------------------------------|
| Nuts                    | 0                   | 0                            | 0.5                           | 1                        | 1                              | <b>Maximum of 1</b>                             |
| Beans/Legumes           | 0                   | 0                            | 0.5                           | 1                        | 1                              | <b>Maximum of 1</b>                             |
| Oily Seafood**          |                     |                              |                               |                          |                                | Oily Fish Capped at 1.5                         |
| Oily Fish               | 0                   | 0.5                          | 1                             | 1.5                      | 1.5                            |                                                 |
| Tinned Fish             | 0                   | 0.5                          | 1                             | 1.5                      | 1.5                            | Other Fish Capped at 0.5                        |
| Other Seafood           |                     |                              |                               |                          |                                |                                                 |
| White Fish              | 0                   | 0.25                         | 0.5                           | 0.5                      | 0.5                            | Total Seafood Points =                          |
| Other Seafood           | 0                   | 0.25                         | 0.5                           | 0.5                      | 0.5                            | Oily + Other, <b>Capped at 2 total</b>          |
| Eggs                    | 0                   | 0.5                          | 1                             | 1                        | 0.5                            | <b>Maximum of 1</b>                             |
| Cheese***               | 0                   | 0.5                          | 1                             | 1                        | 0.5                            | <b>Maximum of 1</b>                             |
| Yoghurt                 | 0                   | 0.5                          | 1                             | 1                        | 1                              | <b>Maximum of 1</b>                             |
| Predominant Cooking Fat |                     |                              |                               |                          |                                | 1 Point if Olive Oil, else 0                    |
| Olive Oil               |                     |                              |                               |                          |                                |                                                 |
| (Other)                 |                     |                              |                               |                          |                                | <b>Maximum of 1</b>                             |
| <b>Drinks Category</b>  | <b>Never/Rarely</b> | <b>Once per week or less</b> | <b>Several times per week</b> | <b>1-2 times per day</b> | <b>3 or more times per day</b> |                                                 |
| Milk****                |                     |                              |                               |                          |                                | 1. If one is never, then the other score stands |
| Full Cream              | 0                   | 0.33                         | 0.75                          | 1                        | 0.5                            |                                                 |
| Skim/Reduced Fat        | 0                   | 0.33                         | 0.75                          | 1                        | 0.5                            | 2. If both are 1-2 times per day, 0.75          |

|                                                                                                           |              |                  |                 |                 |                      |                                                                                                                                                                                                                |
|-----------------------------------------------------------------------------------------------------------|--------------|------------------|-----------------|-----------------|----------------------|----------------------------------------------------------------------------------------------------------------------------------------------------------------------------------------------------------------|
|                                                                                                           |              |                  |                 |                 |                      | <p>3. If one is 3 or more times per day and the other is more than never, 0.5</p> <p>4. If both are several times per week, 1</p> <p>5. All other cases, average the two scores</p> <p><b>Maximum of 1</b></p> |
| <p>Beverage Choices</p> <p>Water</p> <p>Cordial</p> <p>Juice</p> <p>Soft Drink</p> <p>Diet Soft Drink</p> |              |                  |                 |                 |                      | <p>If water is drunk with the most frequency, 1 point.</p> <p>If it's equal highest, 0.5 points.</p> <p>Else, 0 points.</p> <p><b>Maximum of 1</b></p>                                                         |
| Snack and Processed Foods Calculated Differently                                                          |              |                  |                 |                 |                      |                                                                                                                                                                                                                |
| <b>Negative Food Category</b>                                                                             | <b>Never</b> | <b>1-2/Month</b> | <b>1-2/Week</b> | <b>3-6/Week</b> | <b>Daily or more</b> |                                                                                                                                                                                                                |
| Snack Foods                                                                                               |              |                  |                 |                 |                      | Sum all values, maximum value of 1                                                                                                                                                                             |
| Chips                                                                                                     | 0            | 0.33             | 0.67            | 1               | 1                    |                                                                                                                                                                                                                |
| Cakes/Pastries                                                                                            | 0            | 0.33             | 0.67            | 1               | 1                    |                                                                                                                                                                                                                |

|                            |   |      |      |   |   |                                                                                                                         |
|----------------------------|---|------|------|---|---|-------------------------------------------------------------------------------------------------------------------------|
| Dark Chocolate             | 0 | 0.33 | 0.67 | 1 | 1 | Then, ASPREE-MDS is calculated as 1 – Summed Score<br><b>Maximum of 1</b>                                               |
| Milk Chocolate             | 0 | 0.33 | 0.67 | 1 | 1 |                                                                                                                         |
| Sweets/Lollies             | 0 | 0.33 | 0.67 | 1 | 1 |                                                                                                                         |
| Savoury Crackers           | 0 | 0.33 | 0.67 | 1 | 1 |                                                                                                                         |
| Takeaway & Processed Foods |   |      |      |   |   | Sum all values, maximum value of 1<br><br>Then, ASPREE-MDS is calculated as 1 – Summed Score<br><br><b>Maximum of 1</b> |
| Burgers/Pizza              | 0 | 0.33 | 0.67 | 1 | 1 |                                                                                                                         |
| Pies                       | 0 | 0.33 | 0.67 | 1 | 1 |                                                                                                                         |
| Sausages                   | 0 | 0.33 | 0.67 | 1 | 1 |                                                                                                                         |
| Other Processed Meats      | 0 | 0.33 | 0.67 | 1 | 1 |                                                                                                                         |

**Total Possible = 18 Points**

\* Only brown bread—white bread not included;

\*\* Excludes deep-fried/battered fish;

\*\*\* Excluding cream cheese, etc.;

\*\*\*\* Excluding soy milk or other alternative milks.
